# Supplementary material for: Interfacial peroxidase-like catalytic activity of surface-immobilized cobalt phthalocyanine on multiwall carbon nanotubes
Source: Royal Society of Chemistry journal article supplement (doi:10.1039/c4ra15306e), 2014-12-22
Supplement: c4ra15306e1.pdf [file c4ra15306e1.pdf]

**Electronic Supplementary Information For**

**Interfacial peroxidase-like catalytic activity of surface-immobilized  
cobalt phthalocyanine on multiwall carbon nanotubes**

*Nan Li,<sup>a</sup> Wangyang Lu,<sup>\*a</sup> Kemei Pei,<sup>b</sup> and Wenxing Chen<sup>\*a</sup>*

<sup>a</sup>National Engineering Lab for Textile Fiber Materials & Processing Technology

(Zhejiang), Zhejiang Sci-Tech University, Hangzhou 310018, China

<sup>b</sup>Department of Chemistry, Zhejiang Sci-Tech University, Hangzhou 310018, China

E-mail: [luwy@zstu.edu.cn](mailto:luwy@zstu.edu.cn)(W. Lu); [wxchen@zstu.edu.cn](mailto:wxchen@zstu.edu.cn)(W. Chen)

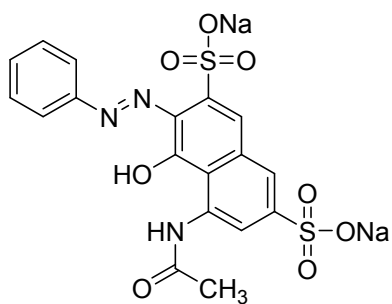

Fig. S1. The molecular structure of C.I. Acid Red 1 (AR1).

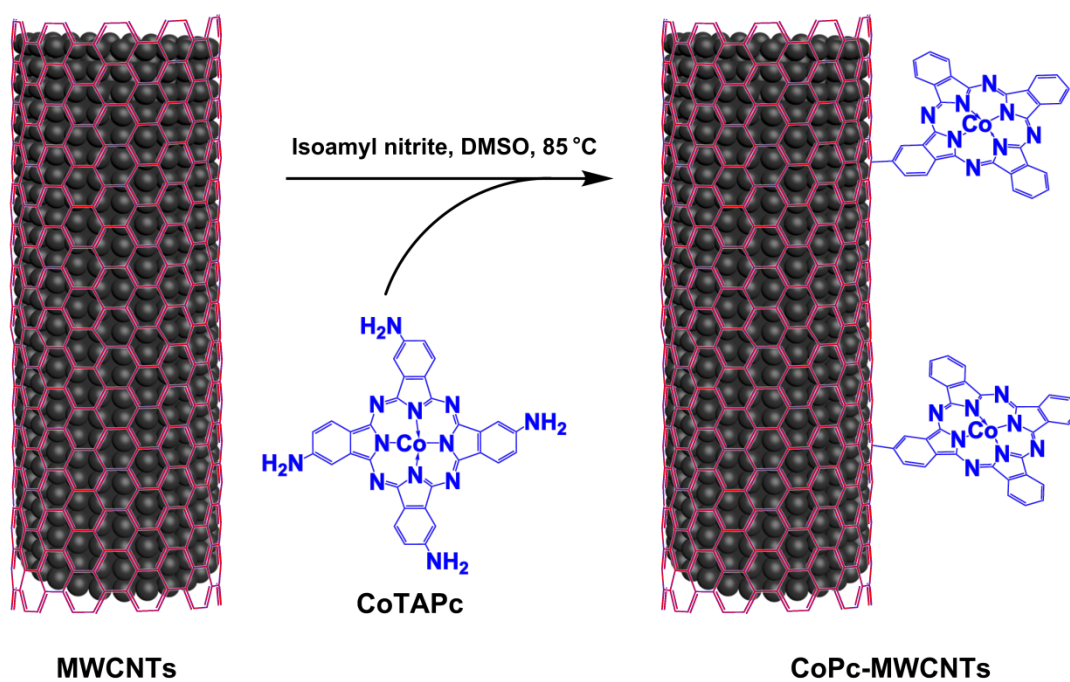

MWCNTs

CoPc-MWCNTs

Fig. S2. The synthesis of CoPc-MWCNTs.

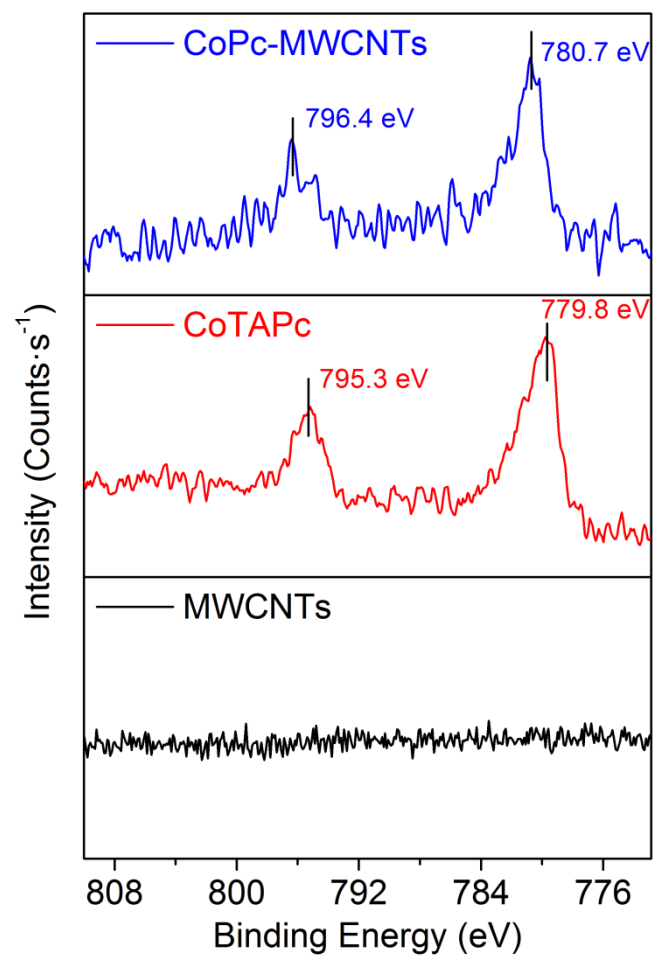

**Fig. S3.** XPS Co 2p spectra of MWCNTs, CoTAPc and CoPc-MWCNTs.

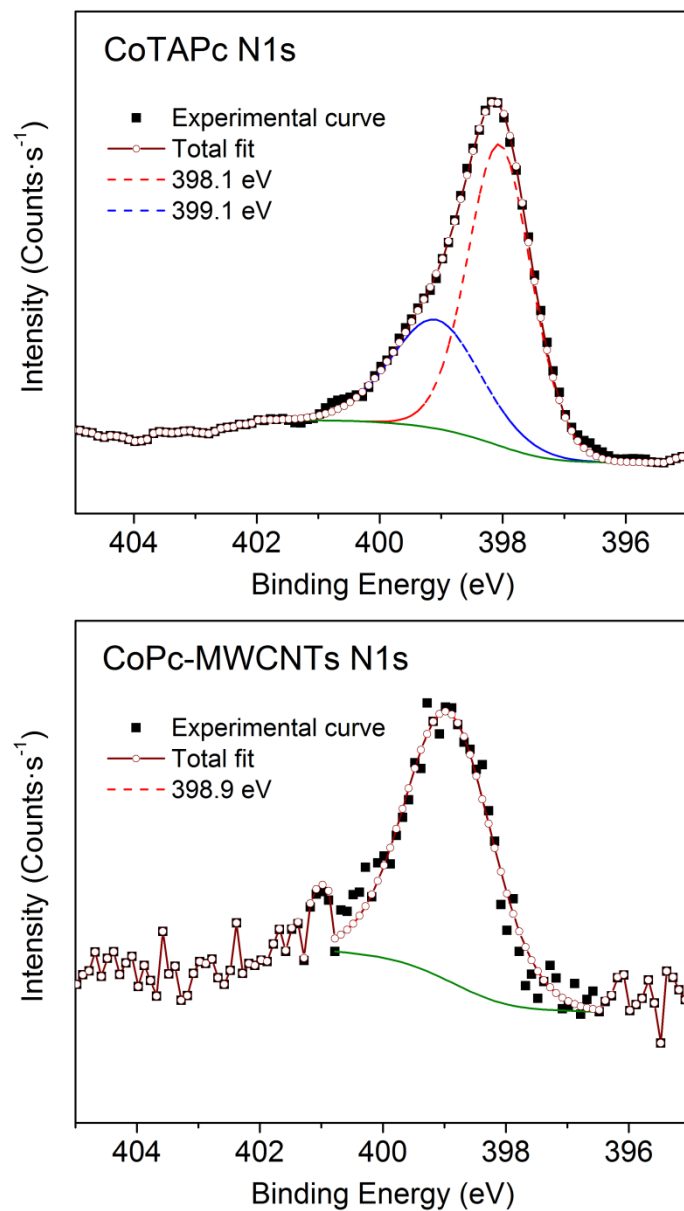

**Fig. S4.** XPS N 1s spectra of CoTAPc and CoPc-MWCNTs.

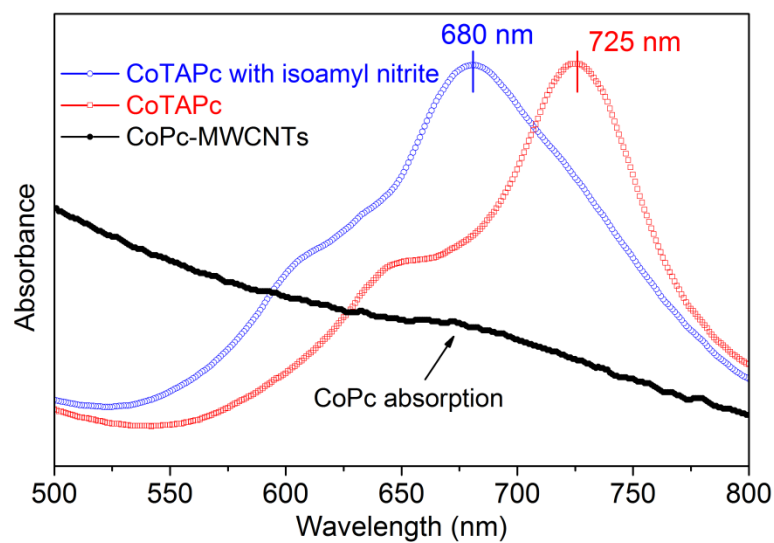

**Fig. S5.** UV-vis spectra of CoTAPc, CoTAPc with isoamyl nitrite and CoPc-MWCNTs in DMSO solution.

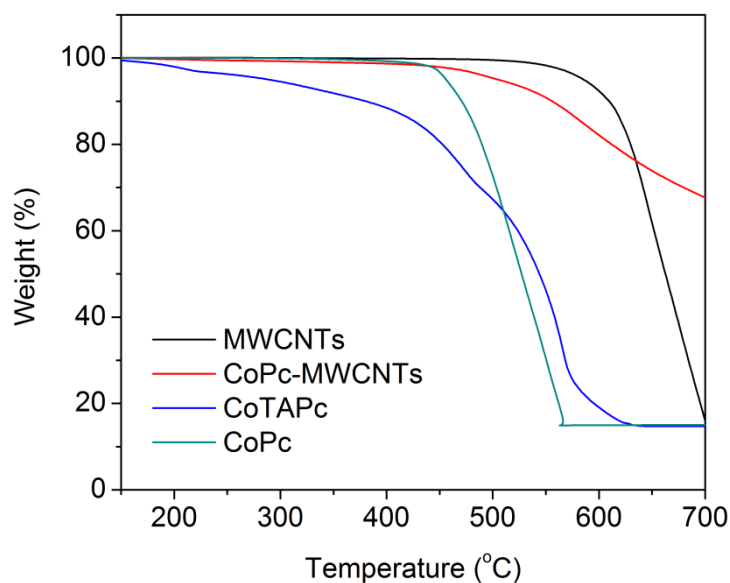

**Fig. S6.** Dynamic thermogravimetric analytical curves of CoPc, CoTAPc, MWCNTs and CoPc-MWCNTs obtained in air.

Thermal stability was investigated by dynamic thermogravimetric analysis (TGA, Mettler Toledo TGA/DSC1) at a heating rate of 20 °C/min using air as carrier gas.

Figure S6 shows the weight loss curves of CoPc, CoTAPc, MWCNTs and CoPc-MWCNTs

by TGA experiment using air as carrier gas. The oxidation of CoTAPc started at  $\sim 150$  °C, while the weight loss of CoPc (without amino substituent groups) started from  $\sim 450$  °C which exhibits higher thermal stability in air. This is due to the fact that the destruction of phthalocyanine ring with amino substituent groups take place more easily than that of the unsubstituted phthalocyanine. In addition, the oxidative decomposition of MWCNTs started at  $\sim 550$  °C with a nearly complete weight loss at  $\sim 710$  °C. Importantly, the initial oxidation of CoPc-MWCNTs at  $\sim 450$  °C is very similar to CoPc, and CoPc-MWCNTs exhibit better thermal stability than MWCNTs at temperatures as high as 850 °C. These results indicates that the direct bonding between CoPc and MWCNTs enhances the stability of them.

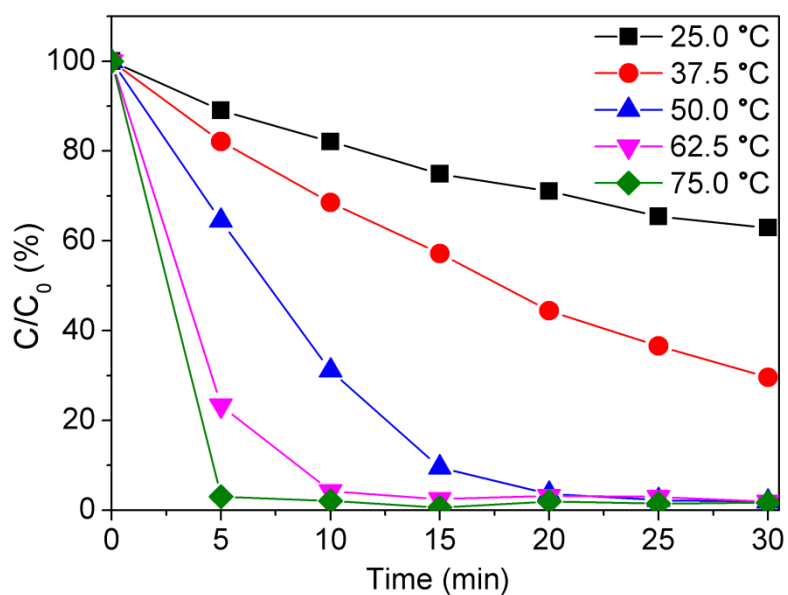

**Fig. S7.** Catalytic oxidation of AR1 ( $5 \times 10^{-5}$  M) at different temperature. ( $[\text{CoPc-MWCNTs}] = 0.2$

g/L (containing  $8.88 \times 10^{-6}$  M of CoPc),  $[\text{C}_{12}\text{-LAS}] = 5 \times 10^{-3}$  M,  $[\text{H}_2\text{O}_2] = 0.01$  M, pH 7.55)

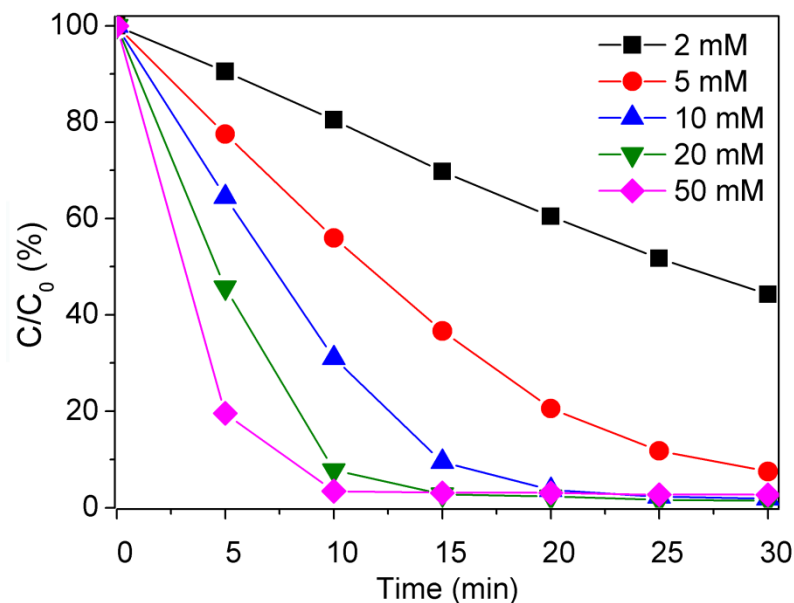

**Fig. S8.** Effect of  $\text{H}_2\text{O}_2$  concentration on the catalytic oxidation of AR1 ( $5 \times 10^{-5}$  M). ([CoPc-MWCNTs]=0.2 g/L (containing  $8.88 \times 10^{-6}$  M of CoPc), [ $\text{C}_{12}$ -LAS]= $5 \times 10^{-3}$  M, pH 7.55, 50 °C.)

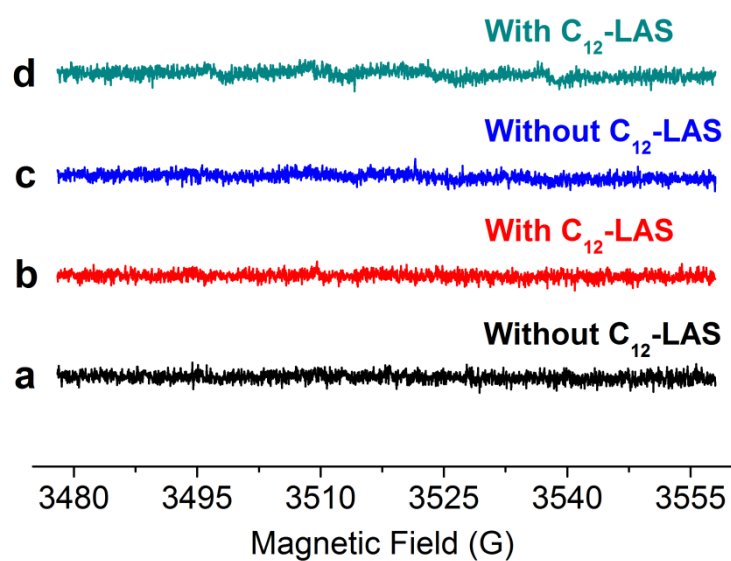

**Fig. S9.** DMPO spin-trapping EPR spectra in AR1 ( $5 \times 10^{-5}$  M) aqueous (curve a and b) and ethanol (curve c and d) solution with and without  $\text{C}_{12}$ -LAS after reaction for 100s. ([CoPc-MWCNTs]=0.2 g/L (containing  $8.88 \times 10^{-6}$  M of CoPc), [ $\text{C}_{12}$ -LAS]= $5 \times 10^{-3}$  M, [ $\text{H}_2\text{O}_2$ ]=0.01 M, [DMPO]=0.02 M, pH 7.55, 50 °C)

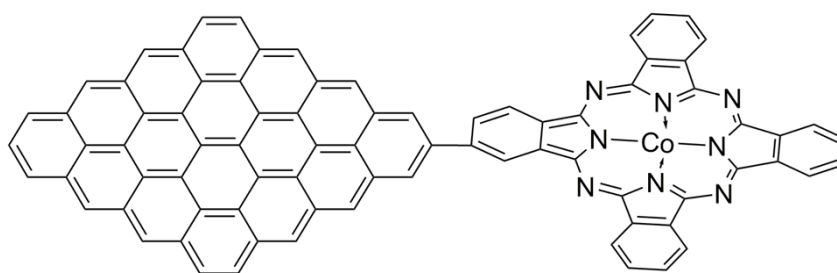

**Fig. S10.** The simplified model of CoPc-MWCNTs for the DFT calculation at the B3LYP/6-31G level of theory using graphite as a coronene-like planar sheet due to the stacked graphite structure of MWCNTs.

The DFT calculations with the B3LYP/6-31G method presented in Fig. 10 and Tables S1 were performed using the Gaussian program<sup>1</sup>.

**Table S1.** Calculated bond lengths for the energy minimized DFT models of the formed cobalt-oxo intermediates in CoTAPc-MWCNTs system with or without LAS.

| Cobalt-oxo intermediates in<br>CoPc-MWCNTs | Total spin | Bond lengths (Å)                     |         |         |
|--------------------------------------------|------------|--------------------------------------|---------|---------|
|                                            |            | Co-O (SO <sub>3</sub> <sup>-</sup> ) | Co-O    | Co-N    |
| Without LAS                                | S=1/2      | /                                    | 1.7428  | 1.95210 |
|                                            |            |                                      | 1.94311 | 1.95467 |
|                                            |            |                                      | 1.94333 | 1.94333 |
|                                            |            |                                      | 1.95315 | 1.95361 |
| With C <sub>2</sub> -LAS                   | S=1/2      | 2.00347                              | 1.79965 | 1.95682 |
|                                            |            |                                      | 1.95750 | 1.95750 |
|                                            |            |                                      | 1.96039 | 1.95375 |
|                                            |            |                                      | 1.95828 | 1.95362 |
| With C <sub>12</sub> -LAS                  | S=1/2      | 1.99004                              | 1.80032 | 1.95362 |
|                                            |            |                                      | 1.95362 | 1.95362 |
|                                            |            |                                      | 1.95362 | 1.95362 |
|                                            |            |                                      | 1.95362 | 1.95362 |

## Reference:

- [1] M. J. Frisch, G. W. Trucks, H. B. Schlegel, G. E. Scuseria, M. A. Robb, J. R. Cheeseman, G. Scalmani, V. Barone, B. Mennucci, G. A. Petersson, H. Nakatsuji,



M. Caricato, X. Li, H. P. Hratchian, A. F. Izmaylov, J. Bloino, G. Zheng, J. L. Sonnenberg, M. Hada, M. Ehara, K. Toyota, R. Fukuda, J. Hasegawa, M. Ishida, T. Nakajima, Y. Honda, O. Kitao, H. Nakai, T. Vreven, J. A. Montgomery, Jr. J. E. Peralta, F. Ogliaro, M. Bearpark, J. J. Heyd, E. Brothers, K. N. Kudin, V. N. Staroverov, R. Kobayashi, J. Normand, K. Raghavachari, A. Rendell, J. C. Burant, S. S. Iyengar, J. Tomasi, M. Cossi, N. Rega, N. J. Millam, M. Klene, J. E. Knox, J. B. Cross, V. Bakken, C. Adamo, J. Jaramillo, R. Gomperts, R. E. Stratmann, O. Yazyev, A. J. Austin, R. Cammi, C. Pomelli, J. W. Ochterski, R. L. Martin, K. Morokuma, V. G. Zakrzewski, G. A. Voth, P. Salvador, J. J. Dannenberg, S. Dapprich, A. D. Daniels, O. Farkas, J. B. Foresman, J. V. Ortiz, J. Cioslowski, D. J. Fox, *Gaussian 09*; Gaussian, Inc.: Wallingford CT, 2009.
